# Supplementary figures and images for: Seroepidemiology of Human Polyomaviruses
Source: PLOS journal article supplement (doi:10.1371/journal.ppat.1000363), 2009-03-26

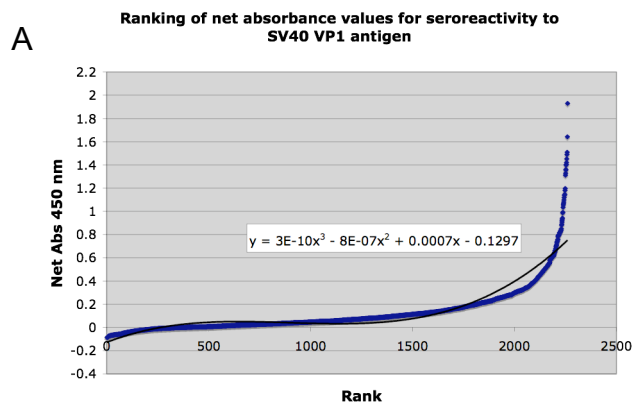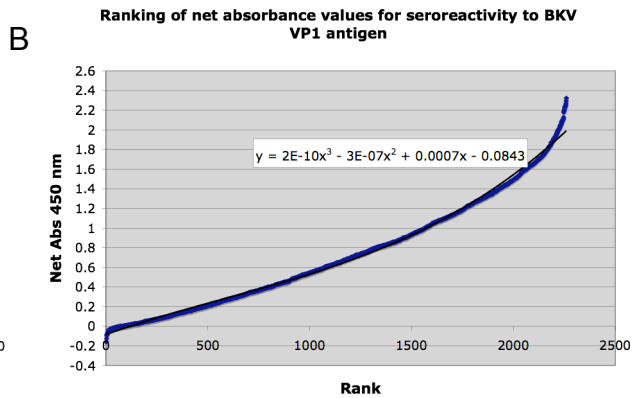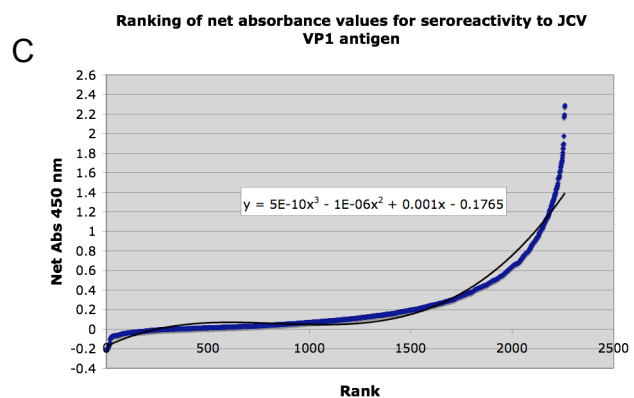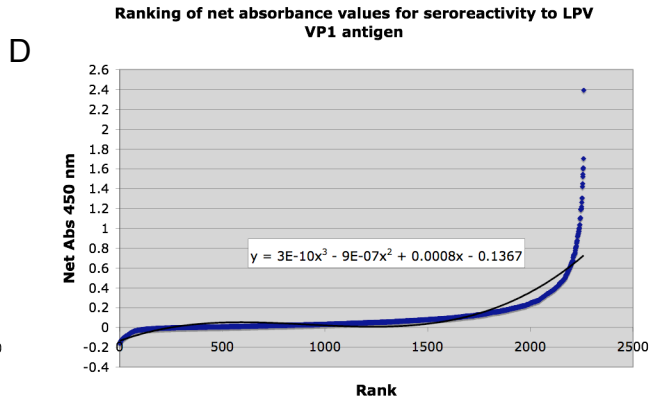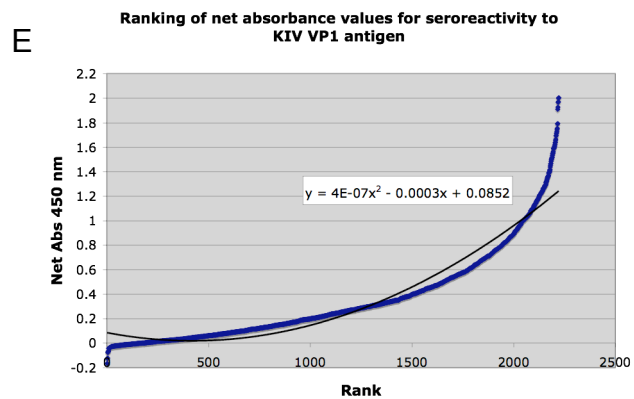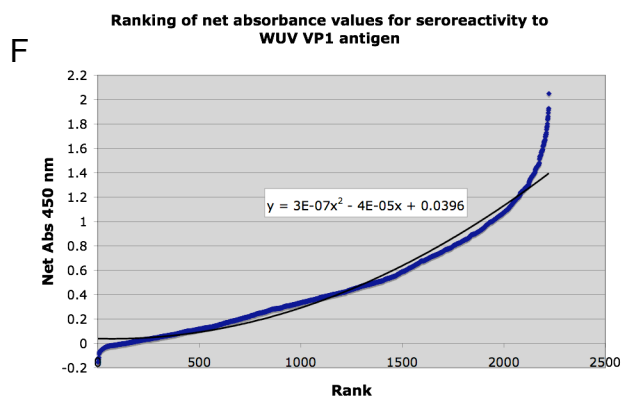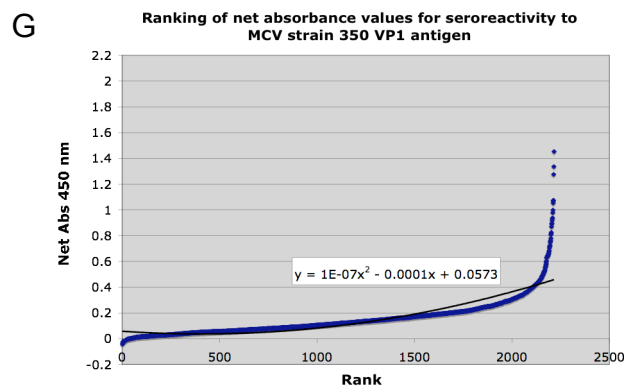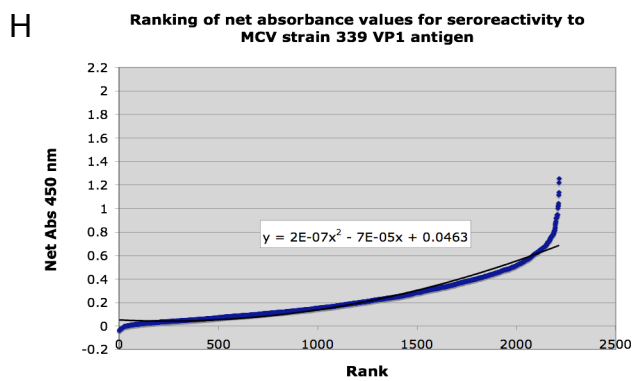

Supplement: S1 (10.1371/journal.ppat.1000363.s001) [file journal.ppat.1000363.s001]
